# Supplementary material for: Modeling embryo-endometrial interface recapitulating human embryo implantation
Source: PubMed Central journal article supplement (PMC10889356; doi:10.1126/sciadv.adi4819), 2024-02-23
Supplement: sciadv.adi4819_sm.pdf [file sciadv.adi4819_sm.pdf]

Supplementary Materials for  
**Modeling embryo-endometrial interface recapitulating human embryo  
implantation**

Shun Shibata *et al.*

Corresponding author: Shun Shibata, shun.shibata.a3@tohoku.ac.jp; Takahiro Arima, tarima@med.tohoku.ac.jp

*Sci. Adv.* **10**, eadi4819 (2024)  
DOI: 10.1126/sciadv.adi4819

**The PDF file includes:**

Figs. S1 to S9  
Table S1  
Legends for data S1 to S3

**Other Supplementary Material for this manuscript includes the following:**

Data S1 to S3

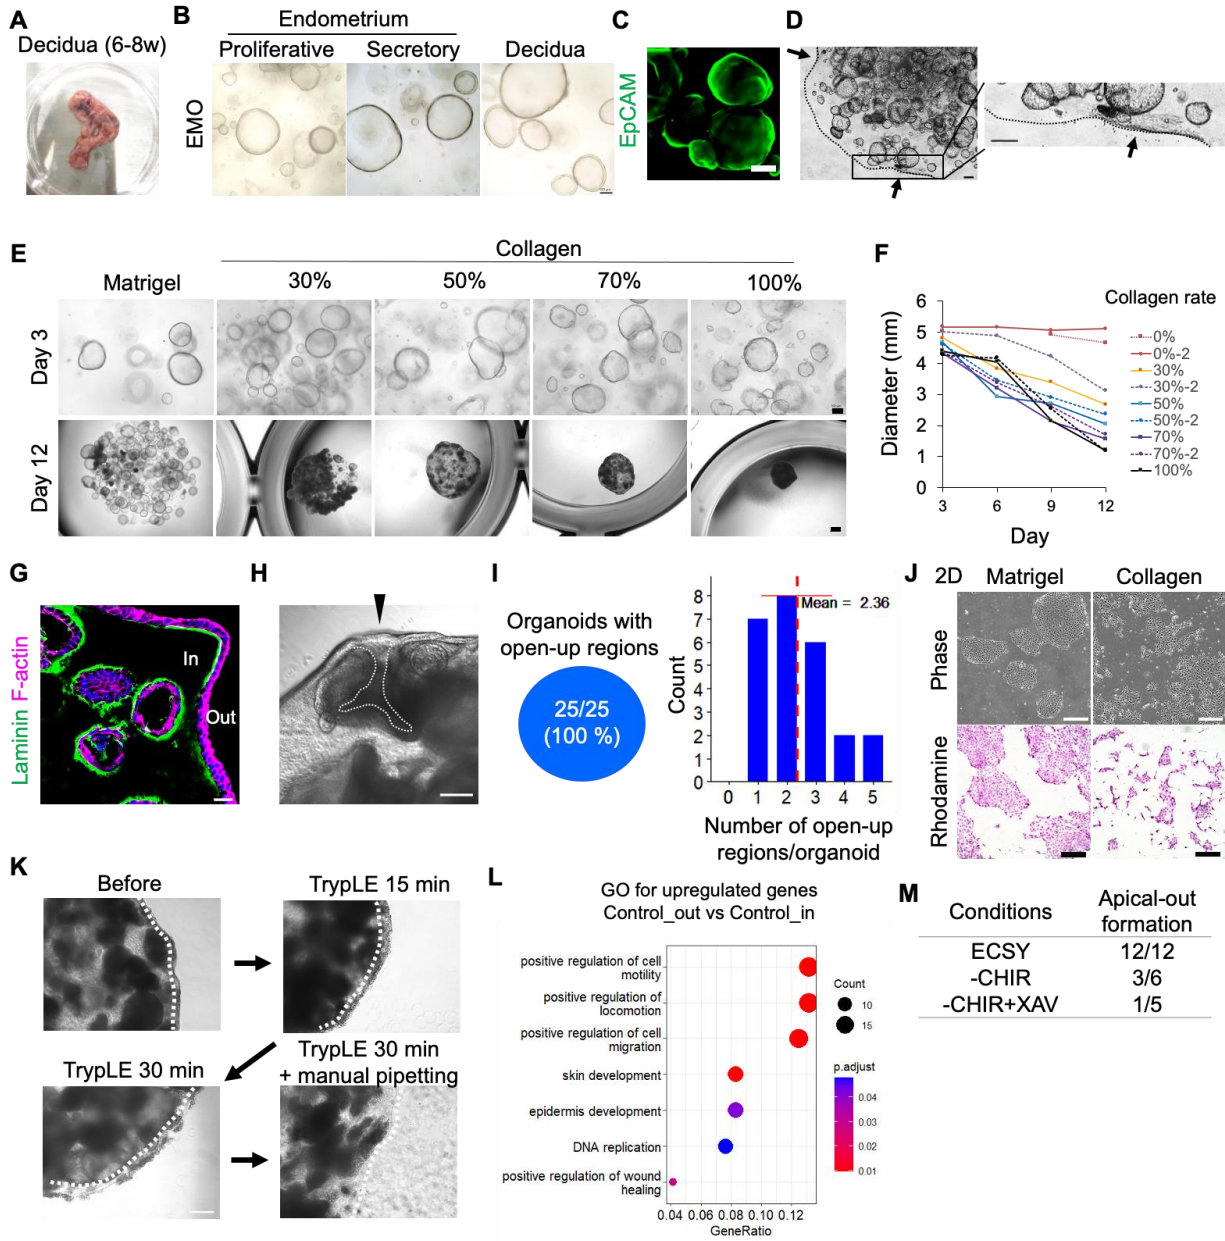

**Fig. S1. Generation of apical-out endometrial organoids (AO-EMO).** (A) Human decidua (6–9 weeks gestation). (B) Bright-field images of human endometrium- and decidua-derived EMO. Scale bar, 100  $\mu$ m. (C) Whole-mount imaging of EMO stained for EpCAM. Scale bar, 500  $\mu$ m. (D) Phase contrast images of EMO cultured in a collagen-based culture on day 3. Black arrows indicate areas where epithelial cells began to cover the surface and the collagen-based gel started to contract. Dashed lines outline the outer edge of the gel. Scale bars, 200  $\mu$ m. (E) Bright-field images of EMO in Matrigel and 30%, 50%, 70%, and 100% collagen-based gels on days 3 and 12 of culture. Scale bars, 100  $\mu$ m (upper) and 500  $\mu$ m (lower). (F) Quantification of diameters of EMO or gel. (G) Immunostaining image of AO-EMO stained for laminin (green) and F-actin (magenta); nuclei are stained with Hoechst (blue). Scale bar, 20  $\mu$ m. (H) Phase contrast image of the open-up region in AO-EMO. The black arrowhead indicates the open-up region. The dotted

line traces the outline of the inside of the endometrial epithelium. Scale bar, 100  $\mu\text{m}$ . **(I)** Quantification of organoids that possess open-up regions (left) and the number and distribution of open-up regions per organoid. The vertical red dashed line indicates the mean value, while the horizontal red lines represent the standard deviation. **(J)** Phase contrast and rhodamine staining images of 2D-cultured human EMO on Matrigel- or collagen-coated dishes. Scale bars, 500  $\mu\text{m}$  (upper) and 200  $\mu\text{m}$  (lower). **(K)** Phase contrast images of AO-EMO during the separation process. Scale bar, 200  $\mu\text{m}$ . **(L)** GO terms related to biological processes enriched in outer (Control\_out) versus inner (Control\_in) cells of AO-EMO pre-treated with hormone. **(M)** Quantification of AO formation rate under various culture conditions.

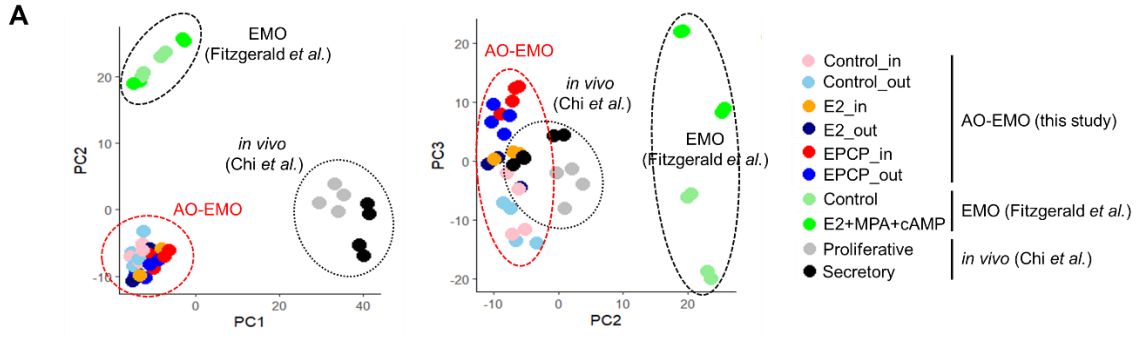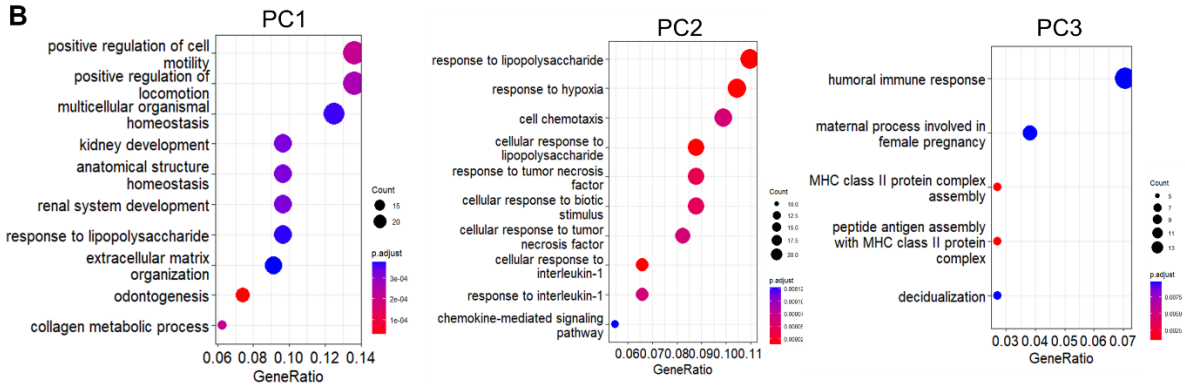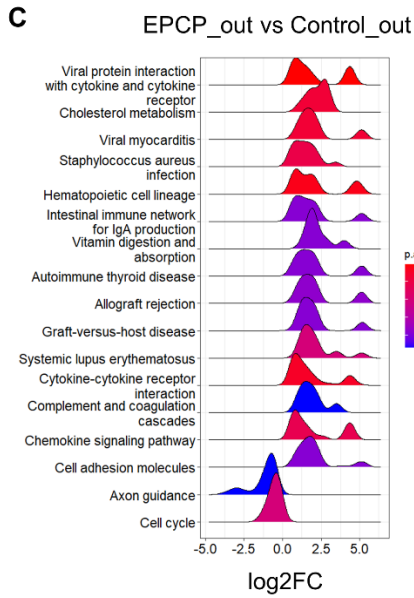

**D**

ERA genes\_UP (143 genes) FC > 3

| Category     | Term                                | Count | PValue   |
|--------------|-------------------------------------|-------|----------|
| KEGG_PATHWAY | Complement and coagulation cascades | 7     | 1.57E-04 |
| KEGG_PATHWAY | Mineral absorption                  | 5     | 0.001772 |

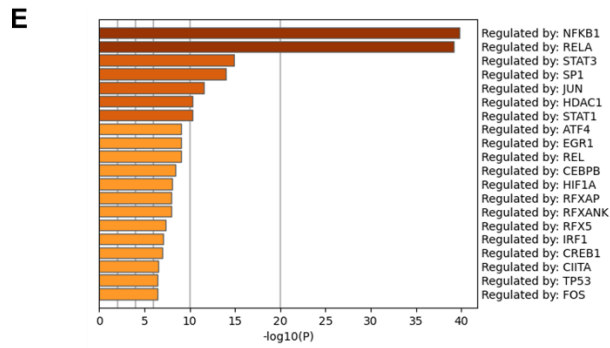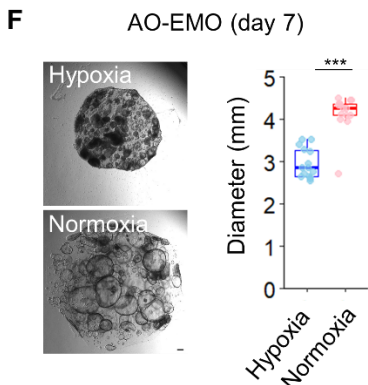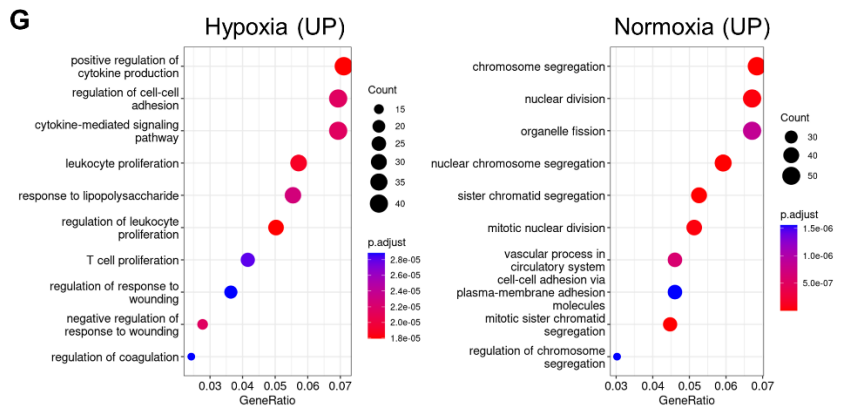

**Fig. S2. Collagen-based culture enhances the maturation and spatial heterogeneity of endometrial epithelial cells.**

(A) Principal component analysis of the transcriptome of AO-EMO, conventional EMO (31), and *in vivo* endometrial epithelial cells (33). (B) GO terms (biological processes) enriched in genes of PC1, PC2, and PC3. (C) Pre-ranked gene set enrichment analysis (GSEA) of upregulated genes in outer cells treated with hormone (EPCP\_out) versus control (Control\_out). (D) KEGG enrichment analysis of extracted upregulated genes (143 genes) in the listed Endometrial Receptivity Analysis (ERA) test (36). (E) Predicted upstream transcription factors using upregulated genes in EMO cultured in collagen. (F) Bright-field images (left) and diameters (right) of AO-EMO cultured under hypoxic and normoxic conditions on day 7 of culture. Scale bar, 200  $\mu\text{m}$ . n = 15 AO-EMO. (G) GO terms related to biological processes enriched in upregulated genes in AO-EMO cultured under hypoxic (left) and normoxic (right) conditions.

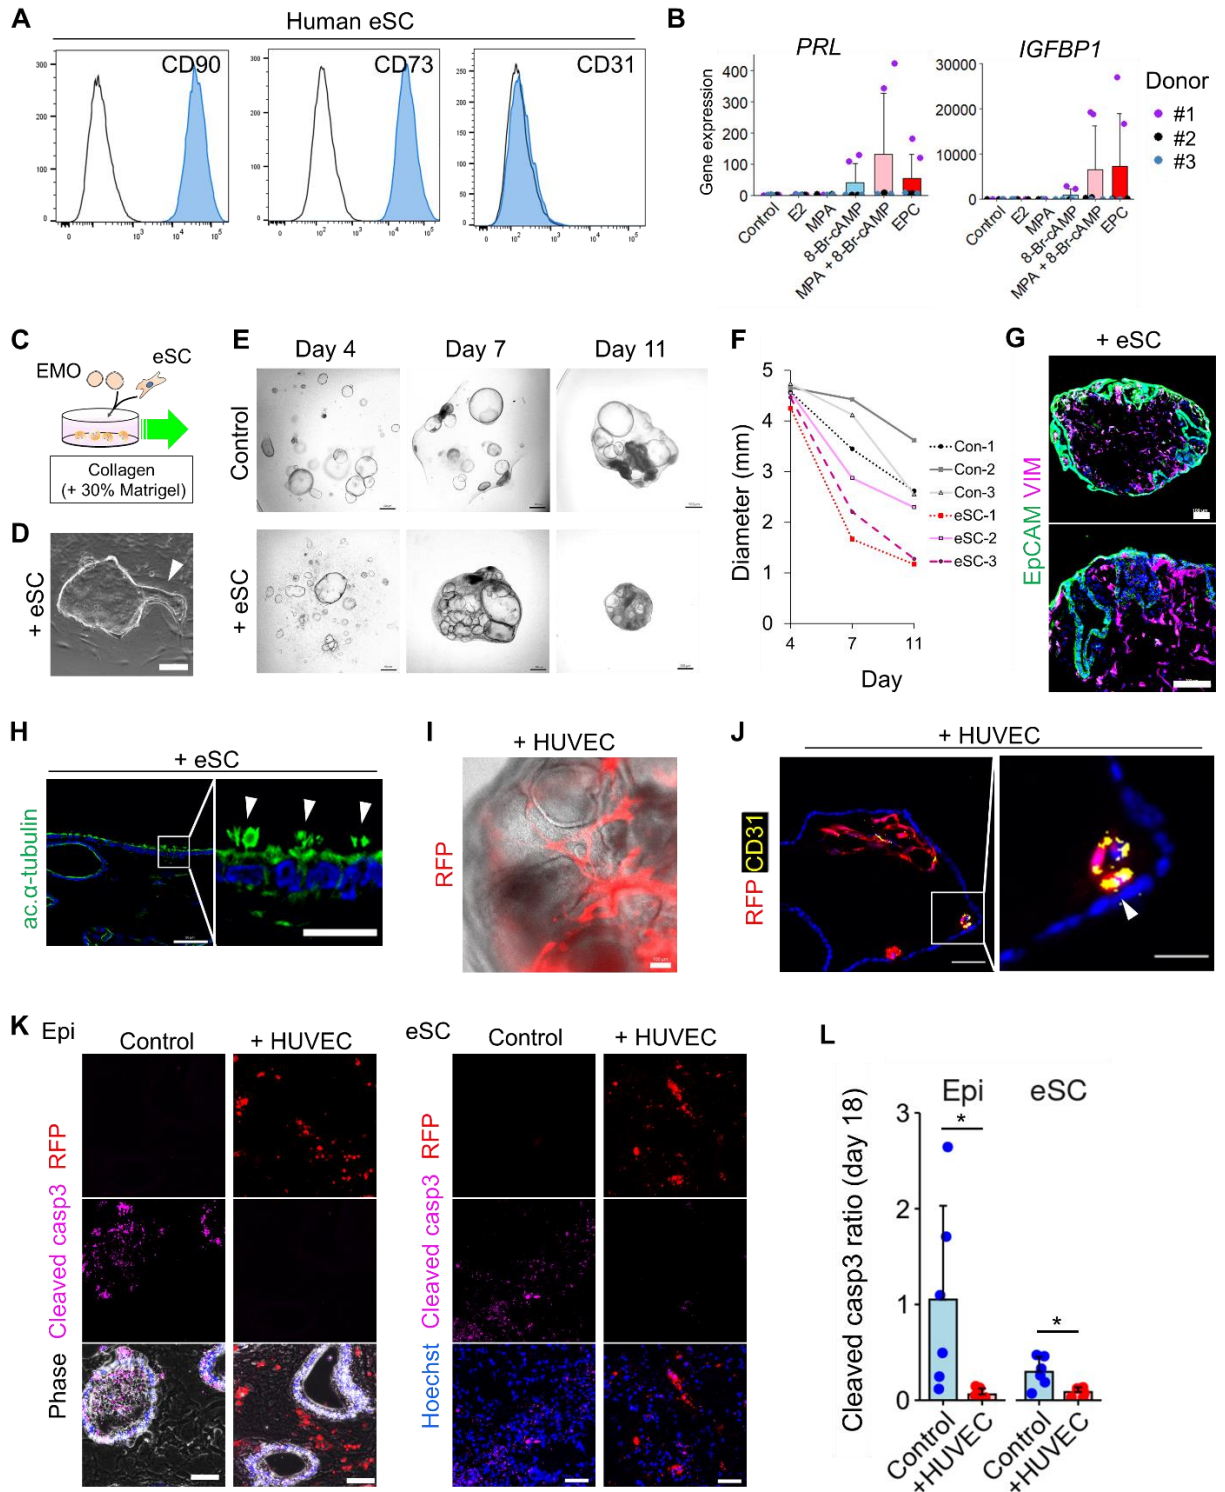

**Fig. S3. Integrating stromal cells and vascular network into AO-EMO.** (A) Flowcytometric analysis of human eSC with endometrial stromal (CD90 and CD73) and endothelial (CD31) markers. (B) Gene expression levels of eSC treated with vehicles (Control), E2, MPA, 8-Br-cAMP, MPA + 8-Br-cAMP, and E2 + MPA + 8-Br-cAMP (EPC). Data shown as mean  $\pm$  SD; n

= 6 from three individual donors. (C) Schematic representation of the culture method. (D) Phase contrast image of EMO co-cultured with eSC. The arrowhead indicates the protrusion of EMO. Scale bar, 100  $\mu\text{m}$ . (E) Bright-field images of EMO co-cultured with or without eSC in collagen-based gel on days 4, 7, and 11. Scale bars, 500  $\mu\text{m}$ . (F) Quantification of diameters of EMO or gel of AO-EMO with or without eSC. (G) Fluorescence images of AO-EMO including eSC stained for EpCAM and VIM; nuclei stained with Hoechst (blue). Scale bars, 100  $\mu\text{m}$ . (H) Fluorescence images of AO-EMO including eSC stained for acetylated (ac.)  $\alpha$ -tubulin; nuclei are stained with Hoechst (blue). Scale bars, 50  $\mu\text{m}$  (upper) and 20  $\mu\text{m}$  (lower). Arrowheads indicate ac.  $\alpha$ -tubulin<sup>+</sup> cilia. (I) Bright-field and fluorescence image of AO-EMO, including RFP-HUVEC. Scale bar, 500  $\mu\text{m}$ . (J) Bright-field and fluorescence image of AO-EMO, including eSC and RFP-HUVEC. Scale bar, 500  $\mu\text{m}$ . (K) Fluorescence images of AO-EMO including RFP-HUVEC stained for CD31; nuclei stained with Hoechst (blue). Arrowheads indicate luminal structures. Scale bars, 50  $\mu\text{m}$  and 20  $\mu\text{m}$  (magnified). (L) Phase contrast and fluorescence images of AO-EMO co-cultured with RFP-HUVEC (red) and AO-EMO + eSC co-cultured with RFP-HUVEC (red), cultured for 18 days stained for cleaved caspase (Casp)-3; nuclei stained with Hoechst (blue). Scale bars, 50  $\mu\text{m}$ . (M) Quantification of cleaved Casp3<sup>+</sup> ratio normalized to nuclei. Data shown as mean  $\pm$  SD; \*P < 0.05; n = 6 frozen sections from three independent experiments.







**Fig. S4. Characterization of AO-EMO at the single-cell level.** (A) Schematic representation of the experimental procedure (upper). Flow cytometry image for DAPI<sup>+</sup> sorting of AO-EMO + eSC/HUVEC, and phase contrast and fluorescence images of sorted nuclei (lower); Scale bar, 20  $\mu\text{m}$ . (B) Feature plots showing expression levels and distribution of marker genes. (C) Heatmap showing the top five most upregulated genes in each cluster of AO-EMO + eSC/HUVEC. (D and E) UMAP projection of the four datasets integration (30, 35). The pie charts show the proportion of each cell type occupied by each dataset (D). Each of the four datasets is overlaid with a unique color on the integrated data (E). (F) UMAP plot representing the integrated data from AO-EMO + eSC/HUVEC and EMO (Garcia *et al.*). (G) Dot plot showing enriched GO terms in each cluster of AO-EMO + eSC/HUVEC. (H) Bar graph representing GO term (BP) enriched in AO-EMO + eSC/HUVEC with (upper) or without (lower) hormone (EPCP) treatment. (I) Violin plots representing the expression levels of hormone-responsive genes of the stromal population in AO-EMO + eSC/HUVEC with or without hormone treatment.

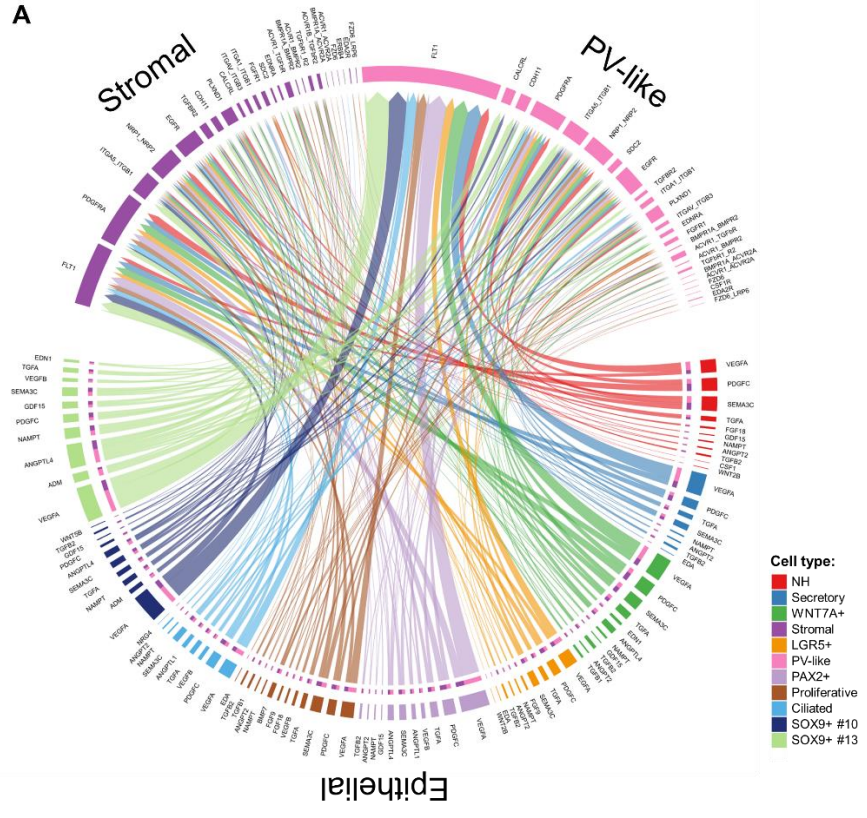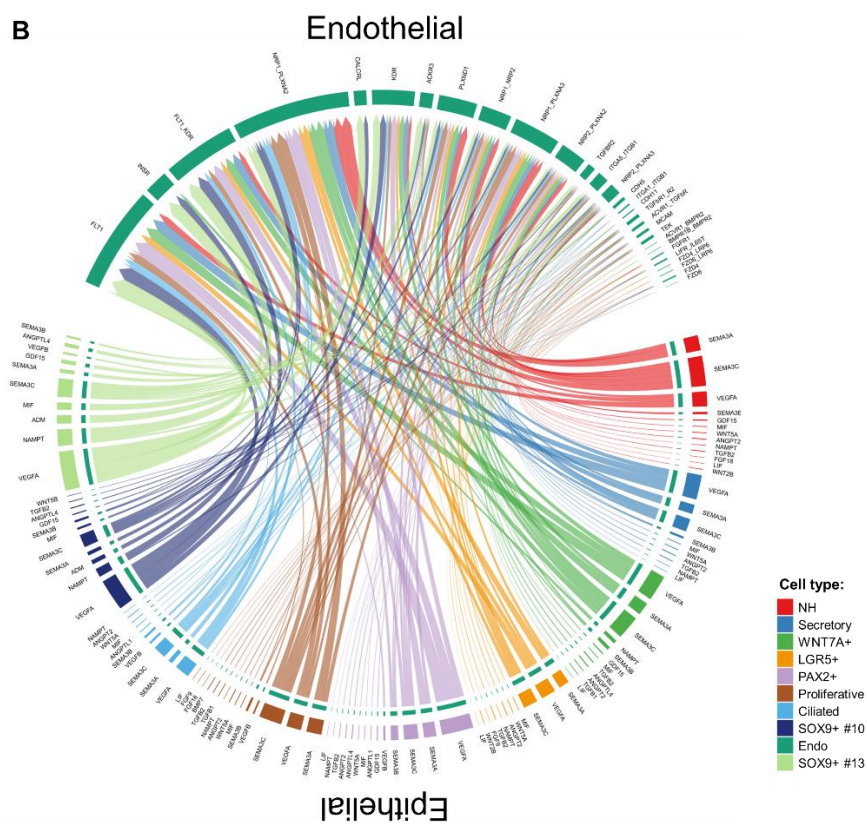

**Fig. S5. Ligand-receptor analysis in AO-EMO + eSC/HUVEC snRNA-seq data.** This visualization represents inferred cellular communication patterns between different cell types based on ligand-receptor interactions. **(A)** Potential interactions between epithelial and endothelial cells, while **(B)** highlights those between epithelial and stromal cells.

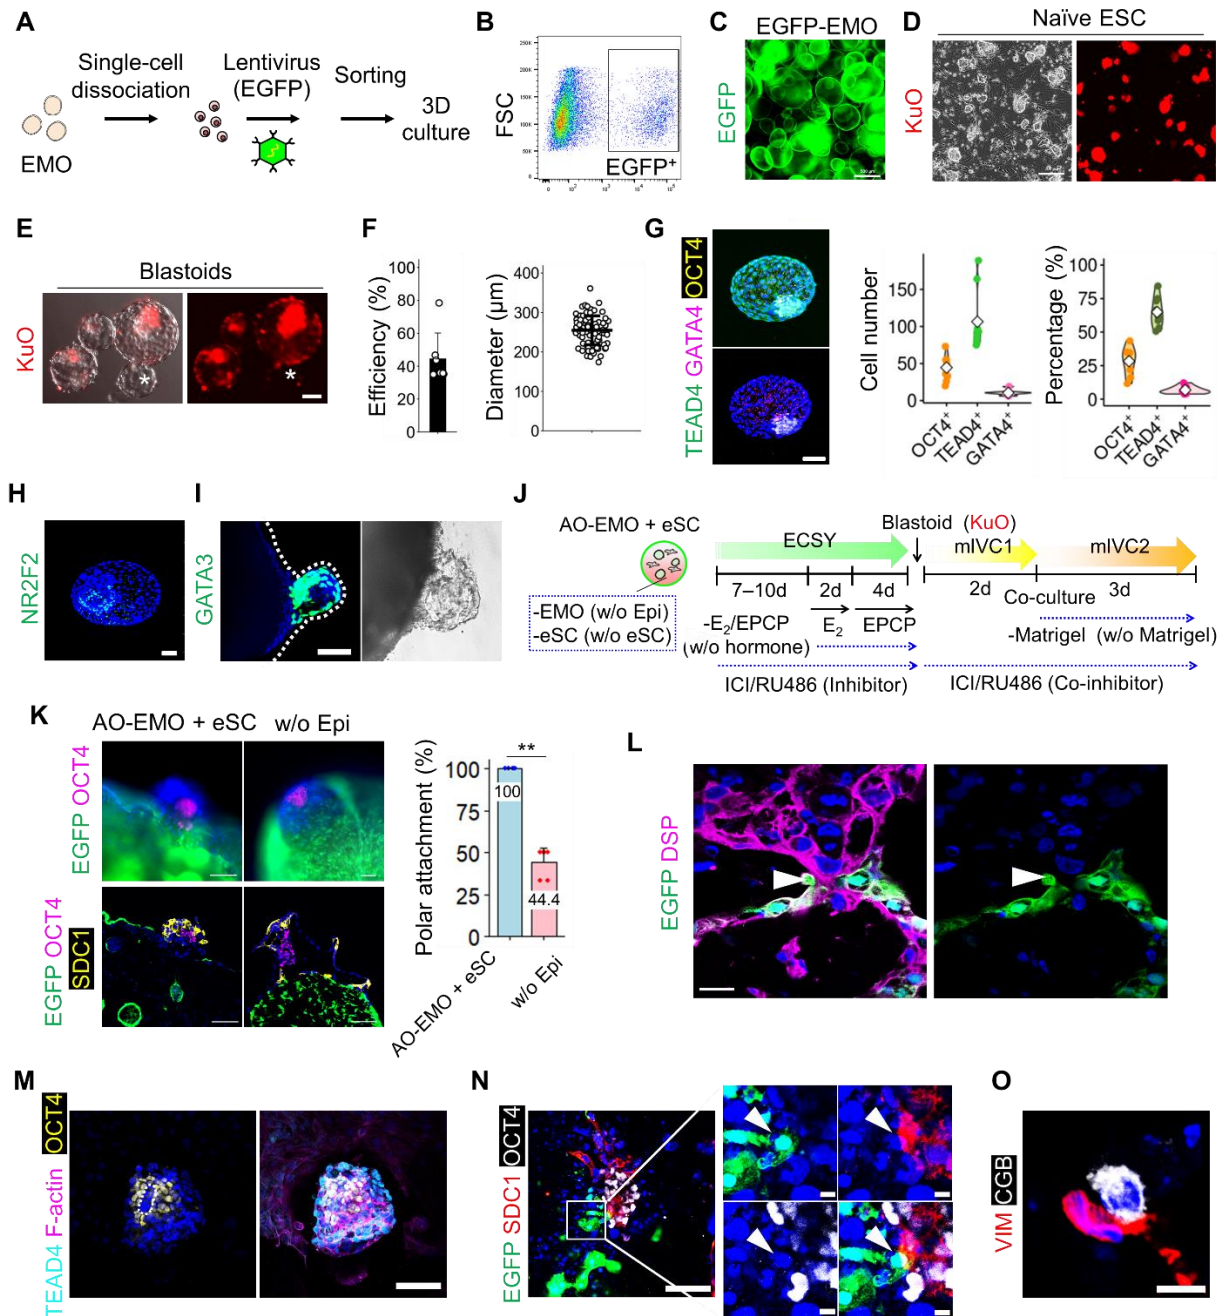

**Fig. S6. Feto-maternal assembloids mimic human embryo implantation.** (A) Schematic representation of the experimental procedure for generating EGFP-expressing human EMO (EGFP-EMO). (B) Flow cytometry graph for EGFP<sup>+</sup> sorting of lentivirus-infected EMO. (C) Fluorescence image of EGFP-EMO. Scale bar, 500  $\mu$ m. (D) Phase contrast and fluorescence (KuO: red) images of naïve human ESC. Scale bar, 200  $\mu$ m. (E) Bright-field and fluorescence images of KuO<sup>+</sup> human blastoids. Scale bar, 100  $\mu$ m. \* indicates blastoid lacking ICM-like cells. (F) Quantification of formation efficiency (left) and diameter (right) of blastoids. n = 6 independent induction experiments (left) and 85 blastoids (right). (G) Whole-mount imaging of human blastoid stained for TEAD4, GATA4, and OCT4 (left). Scale bar, 100  $\mu$ m. Quantification

of the OCT4<sup>+</sup>, TEAD4<sup>+</sup>, and GATA4<sup>+</sup> cells, and their respective proportions of the total cell number in blastoids (right). n = 9 blastoids. **(H)** Whole-mount imaging of human blastoid stained for NR2F2; nuclei stained with Hoechst (blue). Scale bar, 100 μm. **(I)** Bright-field and whole-mount imaging of attached blastoid stained for GATA3; nuclei stained with Hoechst (blue). Scale bar, 100 μm. **(J)** Schematic representation of the experimental procedure for quantifying the adhesion rate of blastoids in various culture conditions. **(K)** Whole-mount imaging (upper) and fluorescence images of frozen sections (lower) of feto–maternal assembloid (Epi, EGFP<sup>+</sup> [AO-EMO + eSC]; eSC, EGFP<sup>+</sup> [w/o Epi]) stained for OCT4 and SDC1; nuclei stained with Hoechst (blue). Scale bars, 100 μm (left). Quantification of the ratio of polar attachment of blastoids (right). n = 7 (AO-EMO + eSC) and 6 (w/o Epi) independent co-culture experiments. \*\**P* < 0.01. **(L)** Fluorescence images of feto–maternal assembloid stained for Desmoplakin (DSP); nuclei stained with Hoechst (blue). Scale bar, 20 μm. Arrowheads indicate invading blastoids. **(M and N)** Whole-mount imaging of feto–maternal assembloid (Epi: EGFP<sup>+</sup>) stained for OCT4 and TEAD4 (M) or SDC1 (N); nuclei stained with Hoechst (blue). Arrowheads indicate EGFP<sup>+</sup>/SDC1<sup>+</sup> cells. Scale bars, 100 μm and 10 μm (magnified). **(O)** Fluorescence images of feto–maternal assembloid stained for VIM and CGB; nuclei stained with Hoechst (blue). Scale bar, 10 μm.



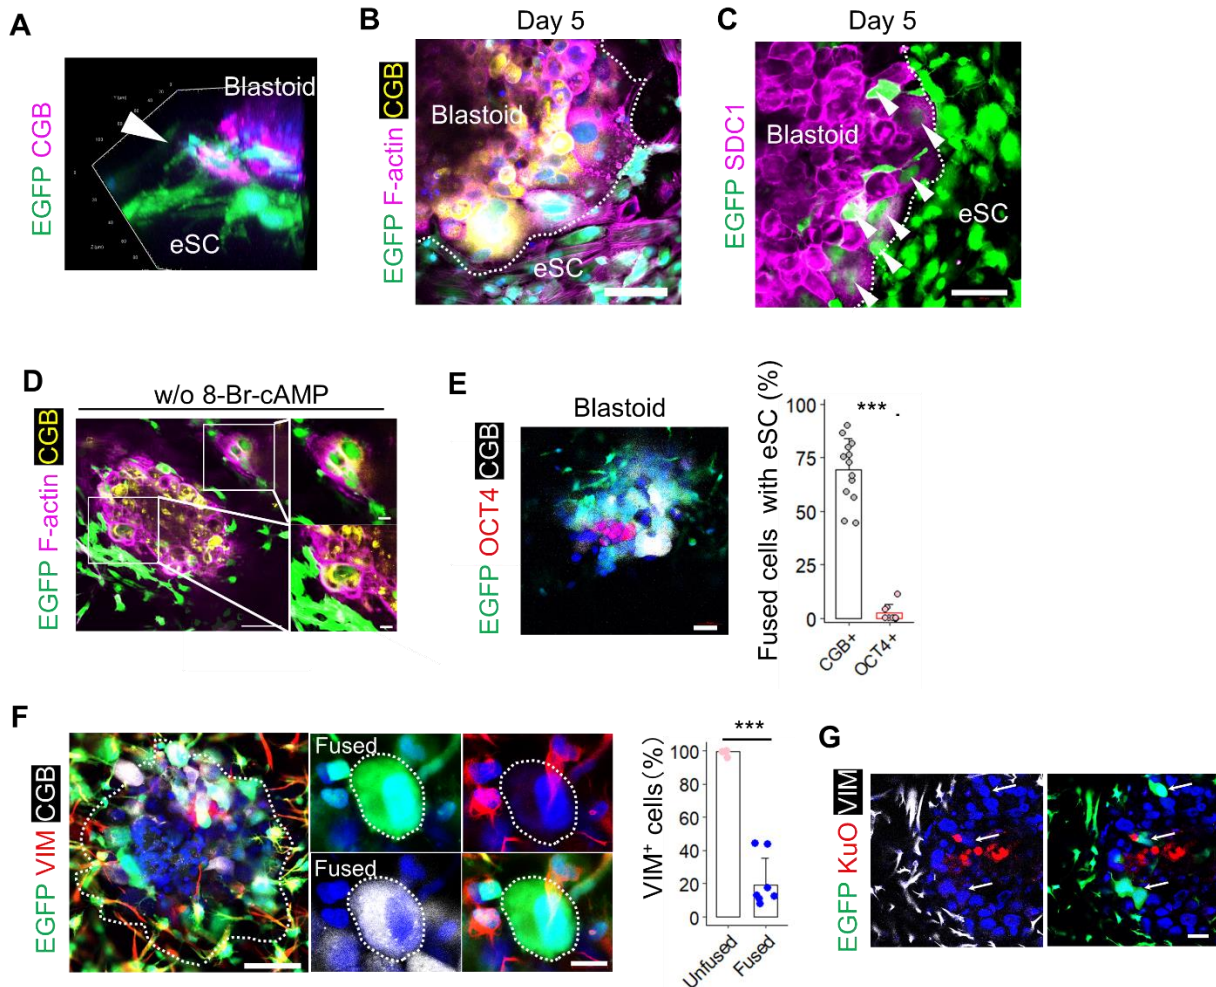

**Fig. S7. The invading syncytium fuses with endometrial stromal cells.** (A) Reconstructed 3D image of EGFP<sup>+</sup>/CGB<sup>+</sup> cells at the blastoid–eSC interface. (B) Whole-mount imaging of blastoids co-cultured with eSC (EGFP<sup>+</sup>) on day 5 stained for CGB and F-actin; nuclei stained with Hoechst (blue). Scale bar, 100  $\mu$ m. (C) Whole-mount imaging of blastoids co-cultured with eSC (EGFP<sup>+</sup>) on day 5 stained for SDC1; nuclei stained with Hoechst (blue). Scale bar, 100  $\mu$ m. Arrowheads point to EGFP<sup>+</sup> nuclei within SDC1<sup>+</sup> cells. The dashed line delineates the interface between the blastoid and eSC regions. (D) Whole-mount imaging of blastoid co-cultured with eSC (EGFP<sup>+</sup>) without 8-Br-cAMP stained for F-actin and CGB; nuclei stained with Hoechst (blue). Scale bars, 100  $\mu$ m and 20  $\mu$ m (magnified). (E) Whole-mount imaging of blastoid co-cultured with eSC (EGFP<sup>+</sup>) stained for OCT4 and CGB (left). Quantification of fused cells with eSC (right); n = 13 blastoids of two independent experiments; \*\*\**P* < 0.001. (F) Whole-mount imaging of blastoid co-cultured with eSC (EGFP<sup>+</sup>) in a collagen-based gel on day 3 stained for VIM and CGB; nuclei stained with Hoechst (blue). Scale bars, 100  $\mu$ m and 20  $\mu$ m (magnified). The dashed lines delineate fused cells. (G) Whole-mount imaging of blastoid (KuO<sup>+</sup>) co-cultured with eSC (EGFP<sup>+</sup>) stained for VIM; nuclei stained with Hoechst (blue). Arrows point out to EGFP<sup>+</sup>/VIM<sup>-</sup> cells. Scale bar, 50  $\mu$ m.



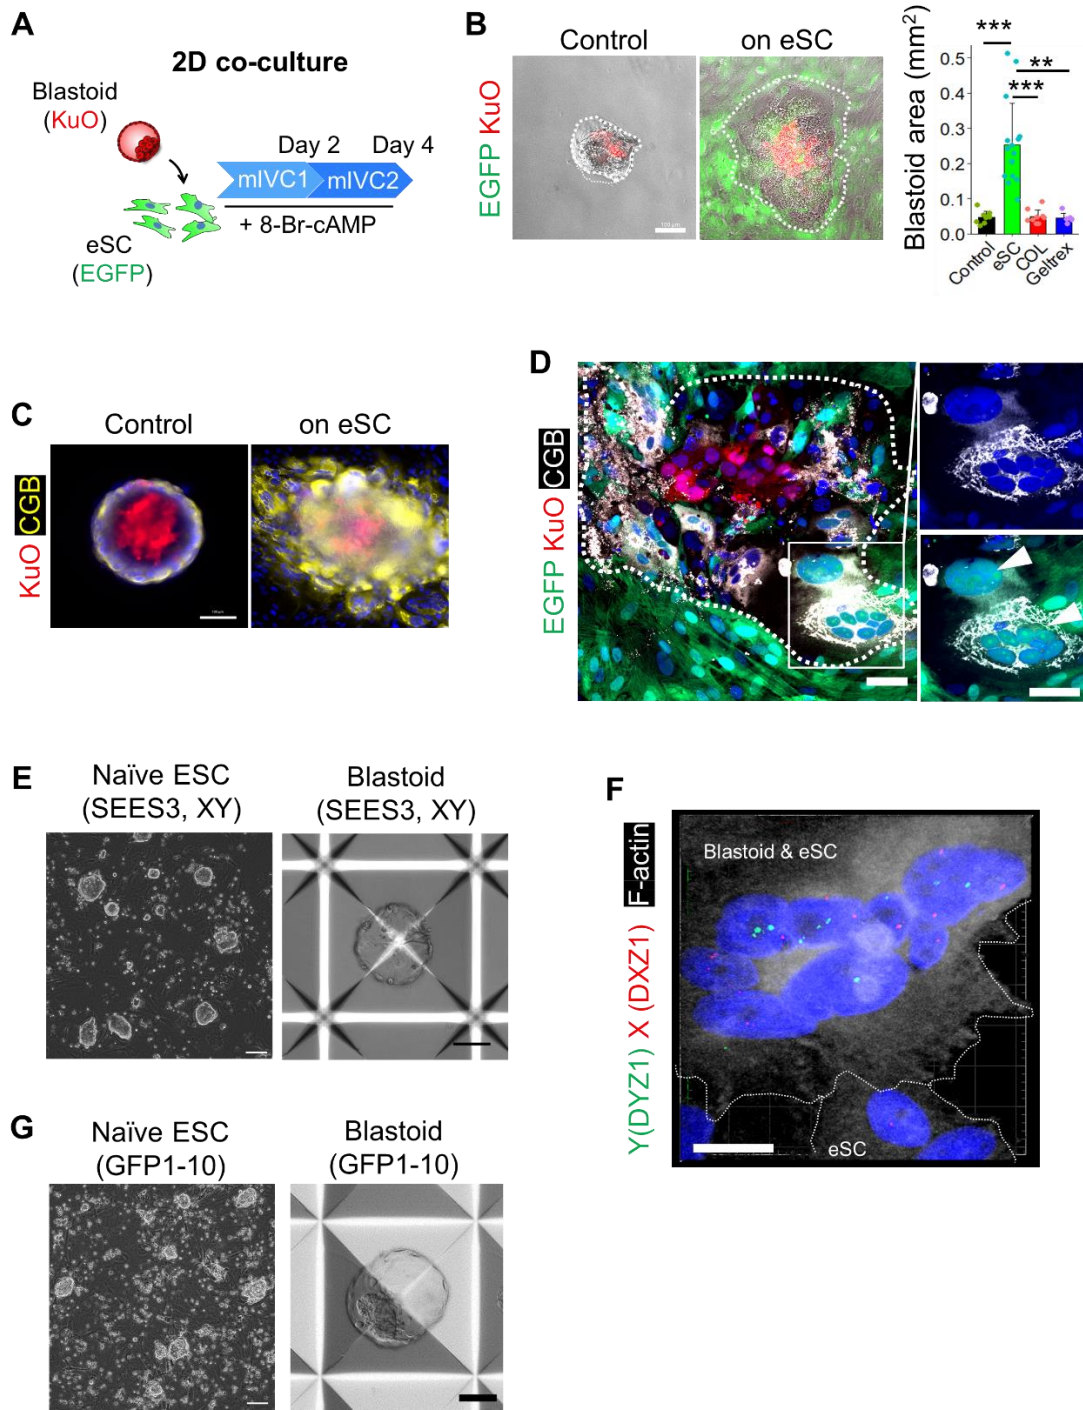

**Fig. S8. 2D co-culture of blastoids and eSC.** (A) Schematic illustration of 2D co-culture experiment. (B) Phase contrast and fluorescence images of adhered blastoids (KuO<sup>+</sup>) with or without eSC (EGFP<sup>+</sup>) (left). Scale bar, 100  $\mu$ m. Quantification of adhered-blastoid area on culture plate (Control), eSC, type I collagen-coated dish (COL), and Geltrex-coated dish (Geltrex) (right); Data shown as mean  $\pm$  SD; \*\*\* $P$  < 0.001, \*\* $P$  < 0.01;  $n$  = 9 (Control), 16 (eSC), 10 (COL), and 6 (Geltrex) blastoids. (C) Fluorescence images of adhered blastoids

(KuO<sup>+</sup>) on culture plate (Control) or eSC (on eSC) stained for CGB; nuclei stained with Hoechst (blue). Scale bar, 100  $\mu$ m. **(D)** Fluorescence images of adhered blastoid (KuO<sup>+</sup>) on eSC (EGFP<sup>+</sup>) stained for CGB; nuclei stained with Hoechst (blue). Arrowheads indicate CGB<sup>+</sup> cells incorporating EGFP<sup>+</sup> eSC nuclei. Scale bars, 50  $\mu$ m. **(E)** Phase contrast image of naïve ESC (SEES3 line) and bright-field image of SEES3-derived blastoid. Scale bars, 100  $\mu$ m. **(F)** X (DXZ1) and Y (DYZ1) chromosome detection of multi-nucleated cells in blastoid (SEES3-derived) co-cultured with eSC stained for F-actin. Maximum projection of fluorescence image; nuclei stained with Hoechst (blue). Scale bar, 20  $\mu$ m. The dashed lines delineate the outlines of the cells based on the cytoplasm stained for F-actin. **(G)** Phase contrast image of naïve ESC and bright-field image of blastoid, both expressing GFP1-10. Scale bars, 100  $\mu$ m.

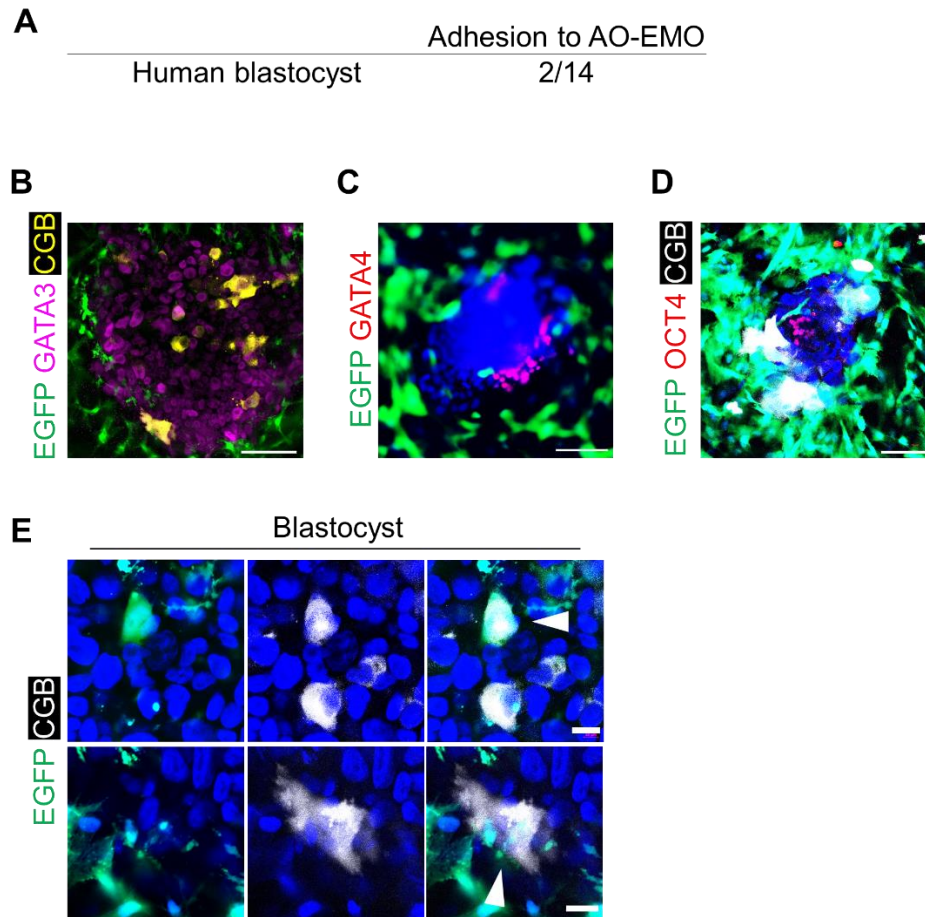

**Fig. S9. Culture and analysis of human blastocysts for investigating interaction with endometrial cells.** (A) Quantification of attached human blastocysts. (B to D) Whole-mount imaging of human blastocyst co-cultured with eSC (EGFP<sup>+</sup>) in collagen-based gel on day 3 stained for GATA3, CGB (B), GATA4 (C), and OCT4, CGB (D); nuclei stained with Hoechst (blue). Scale bars, 100 µm. (E) Whole-mount imaging of human blastocyst co-cultured with eSC (EGFP<sup>+</sup>) in collagen-based gel on day 3 stained for CGB; nuclei stained with Hoechst (blue). Arrowheads indicate CGB<sup>+</sup>/EGFP<sup>+</sup> fused cells. Scale bars, 20 µm.

**Table S1. Antibodies used in this study.**

| Antibody                                          | Supplier         | Cat#            |
|---------------------------------------------------|------------------|-----------------|
| Mouse anti-EpCAM                                  | Cell Signaling   | Cat#2929S       |
| Rabbit anti-laminin                               | Abcam            | Cat#ab11575     |
| Rabbit anti-SOX9                                  | Atlas antibodies | Cat#HPA001758   |
| Rabbit anti-PGR                                   | Cell Signaling   | Cat#8757S       |
| Rabbit anti-vimentin                              | Cell Signaling   | Cat#5741S       |
| Mouse anti-acetylated $\alpha$ -tubulin           | Sigma            | Cat#T7451-25UL  |
| Rabbit anti-cleaved caspase 3                     | Cell Signaling   | Cat#9661T       |
| Mouse anti-SDC1 (PE-conjugated)                   | Miltenyi Biotec  | Cat#130-081-301 |
| Rabbit anti-Oct4A                                 | Cell Signaling   | Cat#2840S       |
| Mouse anti-CGB                                    | Abcam            | Cat#ab9582      |
| Rabbit anti-hCG                                   | Dako             | Cat#IS508       |
| Rat anti-GATA4                                    | Thermo Fisher    | Cat#14-9980-82  |
| Rabbit anti-NR2F2                                 | Abcam            | Cat#ab211776    |
| Rabbit anti-CD31                                  | Abcam            | Cat#ab134168    |
| Rabbit anti-Desmoplakin (DSP)                     | Proteintech      | Cat#23518-1-AP  |
| Mouse anti-CD73 (PE-conjugated)                   | BioLegend        | Cat#344004      |
| Mouse anti-CD90 (FITC-conjugated)                 | eBioscience      | Cat#11-0909-42  |
| Goat anti-rabbit IgG (Alexa Fluor 488-conjugated) | Cell Signaling   | Cat#4412        |
| Goat anti-mouse IgG (Alexa Fluor 488-conjugated)  | Cell Signaling   | Cat#4408        |
| Goat anti-rabbit IgG (Alexa Fluor 555-conjugated) | Cell Signaling   | Cat#4413        |
| Goat anti-mouse IgG (Alexa Fluor 555-conjugated)  | Cell Signaling   | Cat#4409        |
| Goat anti-rabbit IgG (Alexa Fluor 647-conjugated) | Cell Signaling   | Cat#4409        |
| Goat anti-mouse IgG (Alexa Fluor 647-conjugated)  | Cell Signaling   | Cat#4409        |
| Rabbit anti-FITC                                  | ThermoFisher     | Cat#71-1900     |
| Mouse anti-Biotin                                 | Abcam            | Cat#ab201341    |

**Data S1. (separate file)**

Oligonucleotides used in this study.

**Data S2. (separate file)**

RNA-seq sample information and processed data.

**Data S3. (separate file)**

snRNA-seq sample information and differentially expressed genes (DEGs) list.
